# Supplementary material for: BluePrint breast cancer molecular subtyping recognizes single and dual subtype tumors with implications for therapeutic guidance
Source: PubMed Central journal article supplement (PMC9464757; doi:10.1007/s10549-022-06698-x), 2022-08-19
Supplement: 10549_2022_6698_MOESM1_ESM.pdf [file 10549_2022_6698_MOESM1_ESM.pdf]

## BluePrint Breast Cancer Molecular Subtyping Recognizes Single and Dual Subtype Tumors with Implications for Therapeutic Guidance

Authors: Midas M Kuilman<sup>‡1</sup>, Architha Ellappalayam<sup>‡ 1</sup>, Andrei Barcaru<sup>1</sup>, Josien C Haan<sup>1</sup>, Rajith Bhaskaran<sup>1</sup>, Diederik Wehkamp<sup>1</sup>, Andrea R Menicucci<sup>2</sup>, William M Audeh<sup>2</sup>, Lorenza Mittempergher<sup>1\*</sup> AND Annuska M Glas<sup>1\*</sup>

### Affiliations:

1. Department of Research & Development, Agendia N.V, Radarweg 60, 1043NT, Amsterdam, The Netherlands
2. Department of Medical Affairs, Agendia Inc, 22 Morgan, CA 92618 Irvine, USA

‡ Equal contribution as first authors

\*Corresponding authors

Mittempergher ORCID ID: 0000-0003-3425-3965

Glas ORCID ID: 0000-0002-0775-138X

### Corresponding authors:

Lorenza Mittempergher and Annuska M Glas

[lorenza.mittempergher@agendia.com](mailto:lorenza.mittempergher@agendia.com) and [annuska.glas@agendia.com](mailto:annuska.glas@agendia.com)

Tel: 31 20 462 1566 and +31 20 462 1520

Agendia NV, Radarweg 60, 1043 NT, The Netherlands

# Supplementary Information

## Supplementary methods

### - **Microarray processing**

Microarray processing was performed following standard procedure at Agendia [7]. Briefly, Total RNA was isolated from Formalin-Fixed-Paraffin-Embedded (FFPE) tissue with the RNeasy FFPE kit (Qiagen), DNase treated and amplified using a TransPLEX C-WTA kit (Rubicon Genomics, Ann Arbor, MI). Amplified cDNA was labeled using the Genomic DNA Enzymatic Labeling Kit (Agilent Technologies, Santa Clara, CA) and hybridized onto Agendia's diagnostic arrays (custom-designed, Agilent Technologies), according to the manufacturer's instructions.

### - **BluePrint single and dual-subtype classification**

Dual-subtype classification was performed as follows and it is visually summarized in Figure S1. First the standard BluePrint (BP) score was calculated from 15580 samples as previously described (Figure S1a-b) [7]. Briefly, for each tumor, three scores were generated, and the subtype with the highest score was the categorical subtype reported. Next, BP scores were scaled with a SoftMax function (*Goodfellow II, et al (2016) 6.2.2.3 SoftMax Units for Multipouli Output Distributions. Deep Learning. MIT Press. pp 180-184*) (Fig S1c) to reduce variance and outlier impact, which allows for optimal threshold determination between single and dual subtypes. Using a bootstrap algorithm [20], samples were divided into 70% and 30% groups per BP subtype for 1000 iterations (FigS1d). For each iteration, the two highest scores were selected (Fig S1e) and the distance between them was calculated (Fig S1f). The distribution of the differences between BP scores was constructed (Fig S1g). If a bimodal distribution emerged (implying the presence of single and dual subtypes), the separation point (*i.e.*, local minimum) between the two distributions was selected as a threshold candidate (Fig S1h). After 1000 bootstrap iterations, multiple threshold candidates were captured for each subtype. The maximum likelihood values of threshold distributions were taken as thresholds for the identification of dual subtypes (Fig S1i), which are reported in FigS1j. If the difference between the two highest BP SoftMax scores was lower or equal to the corresponding single-dual threshold, then the tumor was classified as a dual subtype comprised of the two highest molecular subtype scores. If tumors had similar scores for all three subtypes, they would be defined as triple subtype.

## Supplementary Tables and Figures

**Table S1:** Clinical-pathological characteristics of the patients analyzed in this study.

|                                                                 | Standard BluePrint classification |              |               |              |
|-----------------------------------------------------------------|-----------------------------------|--------------|---------------|--------------|
|                                                                 | Luminal (n=8664)                  | HER2 (n=245) | Basal (n=664) | All (n=9573) |
| <b>Age at diagnosis (years, median, range)</b>                  | 62 (23-93)                        | 61 (23-95)   | 58.5 (23-87)  | 62 (23-95)   |
| <b>Nodal Status</b>                                             |                                   |              |               |              |
| 0                                                               | 1516                              | 21           | 121           | 1658         |
| 1                                                               | 1320                              | 24           | 47            | 1391         |
| 2                                                               | 335                               | 2            | 6             | 343          |
| 3+                                                              | 163                               | 4            | 7             | 174          |
| Missing                                                         | 5330                              | 194          | 483           | 6007         |
| <b>Grade</b>                                                    |                                   |              |               |              |
| 1                                                               | 1409                              | 6            | 8             | 1423         |
| 2                                                               | 2966                              | 58           | 74            | 3098         |
| 3                                                               | 869                               | 66           | 309           | 1244         |
| Missing                                                         | 3420                              | 155          | 273           | 3848         |
| <b>Clinical subtype based on receptor status</b>                |                                   |              |               |              |
| HR+ HER2-                                                       | 4343                              | 33           | 172           | 4548         |
| HR+ HER2+                                                       | 180                               | 83           | 9             | 272          |
| HR- HER2+                                                       | 20                                | 37           | 9             | 66           |
| HR- HER2-                                                       | 64                                | 2            | 110           | 176          |
| missing                                                         | 4057                              | 90           | 364           | 4511         |
| <b>Ki67 Percentage</b>                                          |                                   |              |               |              |
| Median positivity (1 <sup>st</sup> - 3 <sup>rd</sup> quantiles) | 16 (10-30)                        | 40 (21-60)   | 50 (20-80)    | 18 (10-32)   |

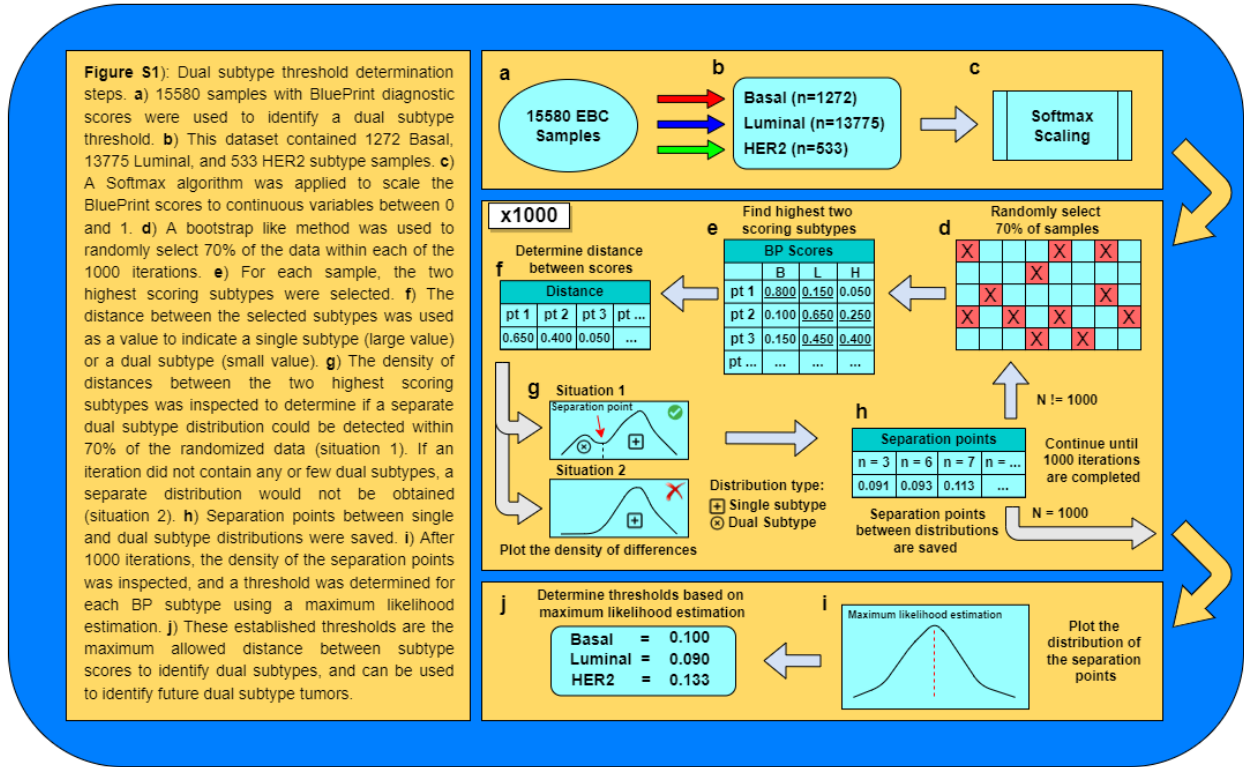

**Table S2:** Multivariate logistic regression analysis to examine the subtype, HR status, tumor grade, tumor stage, and treatment variables to determine those that best predict response to HER2-targeted therapy. Only cases with complete clinical information were used.

| Variables              |              | Exp (B) | 95% C.I. for EXP (B) |       | Significance | N   |
|------------------------|--------------|---------|----------------------|-------|--------------|-----|
|                        |              |         | Lower                | Upper |              |     |
|                        |              |         | Intercept            | 5.698 |              |     |
| <b>Subtype</b>         | Single HER2* | -       | -                    | -     | -            | 101 |
|                        | Luminal-HER2 | 0.204   | 0.062                | 0.619 | 0.006        | 25  |
| <b>HR status (IHC)</b> | ER negative* | -       | -                    | -     | -            | 56  |
|                        | ER Positive  | 0.571   | 0.215                | 1.466 | 0.249        | 70  |
| <b>Tumor grade</b>     | Grade II*    | -       | -                    | -     | -            | 51  |
|                        | Grade III    | 0.982   | 0.422                | 2.251 | 0.967        | 75  |
| <b>Tumor stage</b>     | Stage I*     | -       | -                    | -     | -            | 21  |
|                        | Stage II     | 0.629   | 0.173                | 2.020 | 0.453        | 70  |
|                        | Stage III    | 0.154   | 0.033                | 0.634 | 0.013        | 24  |
|                        | Stage IV     | 0.295   | 0.052                | 1.658 | 0.160        | 11  |
| <b>Treatment</b>       | C + T*       | -       | -                    | -     | -            | 83  |
|                        | C + T + P    | 1.844   | 0.768                | 4.632 | 0.179        | 43  |

\* Used as reference in the odds ratio calculation.

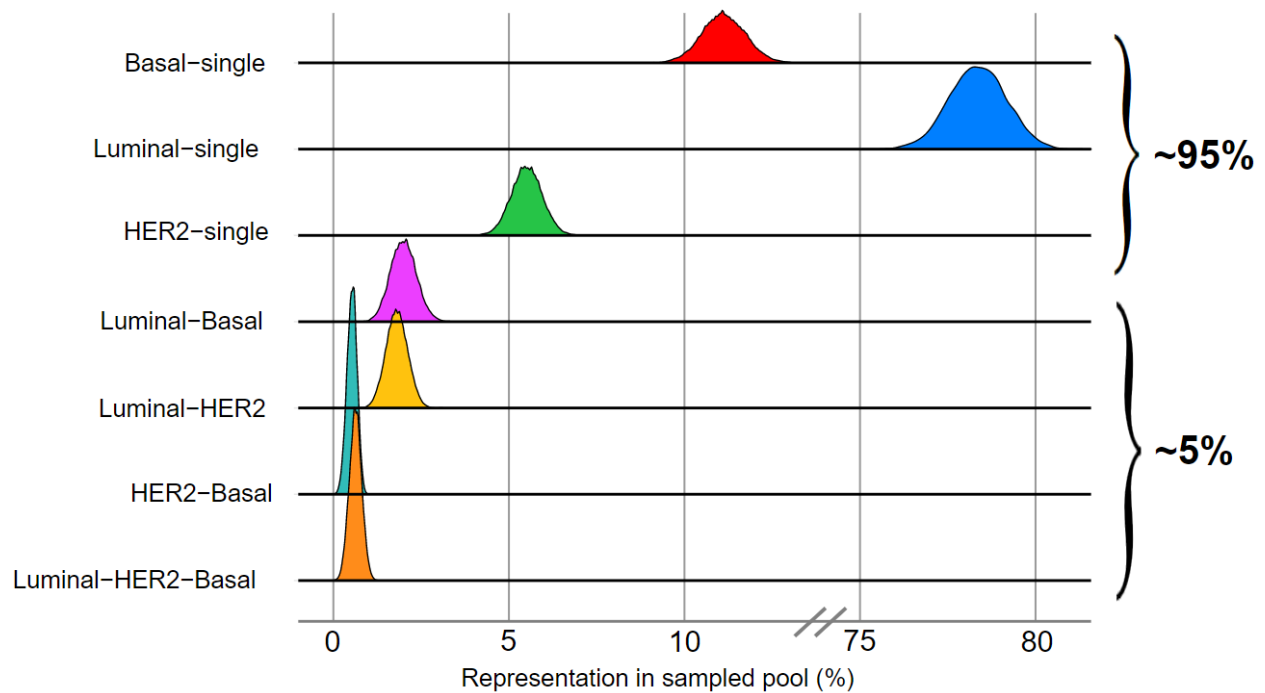

Figure S2: Distribution of the representation of single and dual subtypes in a sampled pool of tumor samples. The x-axis report the proportion in percentage for each subtype (y-axis). Curly brackets on the right indicate the subtype prevalence obtained using the sampled pool. .Sampled pool represents actual occurrences of clinical subtypes (70% HR+HER2-, 13% HR+HER2+, 5% HR-/HER2+ and 12% HR-HER2-) according to literature (<https://seer.cancer.gov/statfacts/html/breast-subtypes.html>) [29].

**Table S3a:** Distribution of dual subtypes over molecular subtypes of Genefu.

|                                    |                         | Genefu molecular subtyping classification |           |        |       |             |
|------------------------------------|-------------------------|-------------------------------------------|-----------|--------|-------|-------------|
|                                    |                         | Luminal A                                 | Luminal B | HER2-e | Basal | Normal-like |
| Single-dual subtype classification | Basal-single-type       | 0                                         | 2         | 42     | 660   | 8           |
|                                    | Luminal-single-type     | 3722                                      | 2303      | 163    | 109   | 435         |
|                                    | HER2-single-type        | 6                                         | 21        | 243    | 6     | 1           |
|                                    | Luminal-Basal-type      | 11                                        | 14        | 63     | 12    | 22          |
|                                    | Luminal-HER2-type       | 16                                        | 34        | 44     | 3     | 2           |
|                                    | HER2-Basal-type         | 0                                         | 0         | 14     | 8     | 1           |
|                                    | Luminal-HER2-Basal-type | 0                                         | 13        | 13     | 3     | 1           |

**Table S3b:** Log<sub>2</sub> fold change and adjusted P value of 4 HER2 related genes by comparing Genefu HER2-e BP Luminal-Basal against Genefu non- HER2-e BP Luminal-Basal tumors.

| Gene | Log fold change | Adjusted P value |
|------|-----------------|------------------|
|------|-----------------|------------------|

|        |        |       |
|--------|--------|-------|
| ERBB2  | 0.346  | 0.138 |
| GRB7   | 0.230  | 0.199 |
| TCAP   | -0.049 | 0.640 |
| STARD3 | 0.199  | 0.159 |
